# Supplementary material for: Laminarin Reduces Cholesterol Uptake and NPC1L1 Protein Expression in High-Fat Diet (HFD)-Fed Mice
Source: MDPI journal article supplement (doi:10.3390/md21120624), 2023-11-29
Supplement: s1 [file s1]

# Supplementary Material

*Article*

## **Laminarin Reduces Cholesterol Uptake and NPC1L1 Protein Expression in High-fat Diet (HFD)-fed Mice**

**Zhuoqian He <sup>1</sup>, Zhongyin Zhang <sup>2</sup>, Pengfei Xu <sup>1</sup>, Verena M. Dirsch <sup>3</sup>, Limei Wang <sup>1,4,\*</sup> and KeWei Wang <sup>1,4</sup>**

<sup>1</sup> Department of Pharmacology, School of Pharmacy, Qingdao University Medical College, Qingdao 266073, Shandong, China

<sup>2</sup> Department of Medicinal Chemistry, School of Pharmacy, Qingdao University Medical College, Qingdao 266073, Shandong, China

<sup>3</sup> Department of Pharmaceutical Sciences, Faculty of Life Sciences, University of Vienna, Josefhofplatz 2, 1090 Vienna, Austria

<sup>4</sup> Institute of Innovative Drugs, Qingdao University, Qingdao 266071, Shandong, China

\* Correspondence: Limei Wang (limei.wang@qdu.edu.cn)

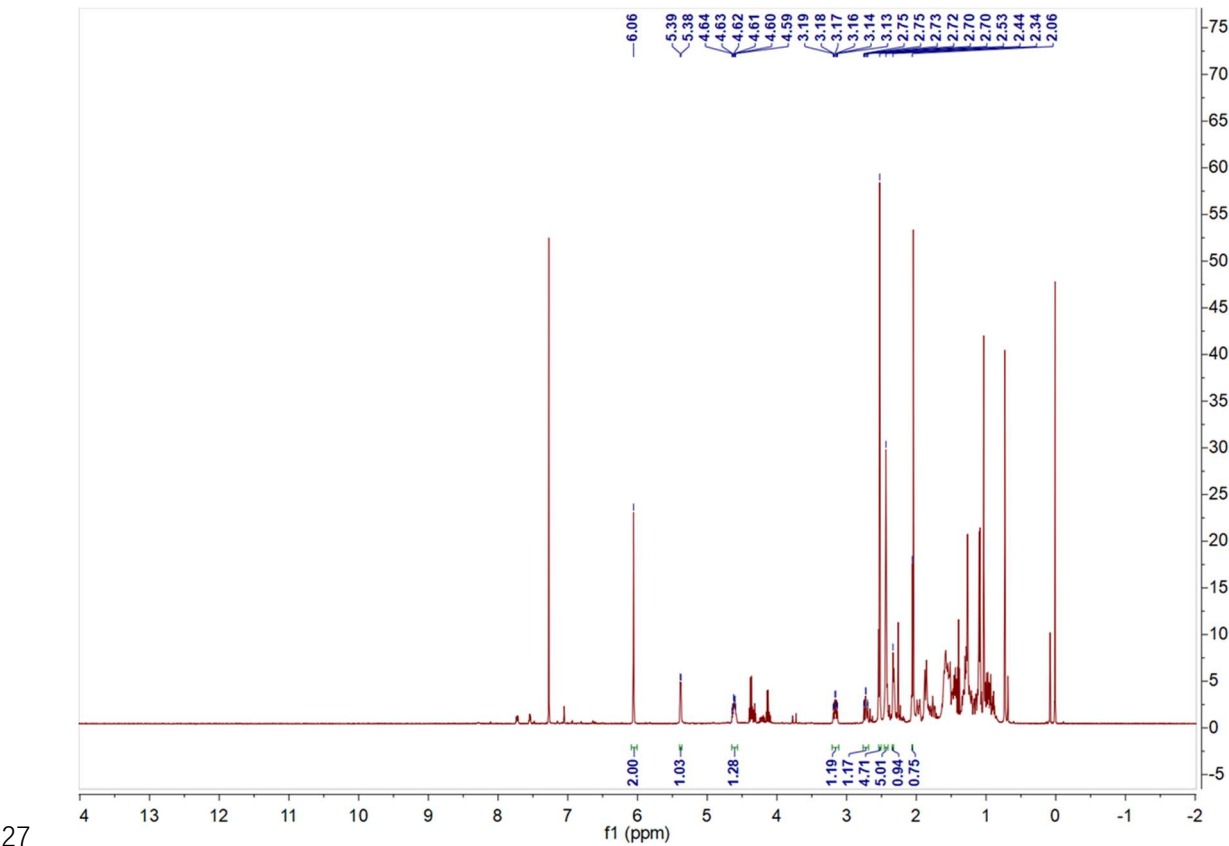

**Fig. S1** The NMR data of synthesized fluorescent BODIPY-cholesterol.

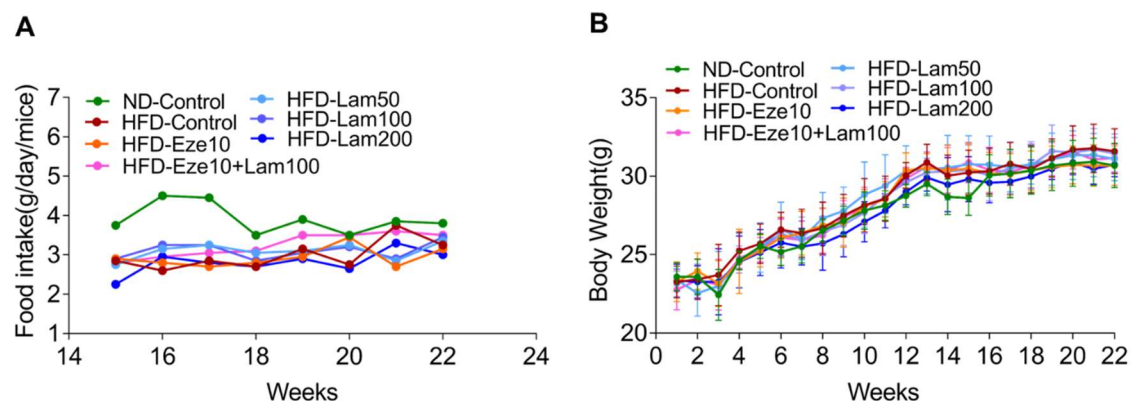

**Fig. S2** The food intake and body weight during the experimental procedure.

A. The average food intake (g/day/mice) of mice during 15-22 weeks. B. Time-course of body weight in the seven groups of mice. Data were presented as the mean  $\pm$  S.D. (n=5~12). There was no significance among the different groups (Two-way ANOVA).

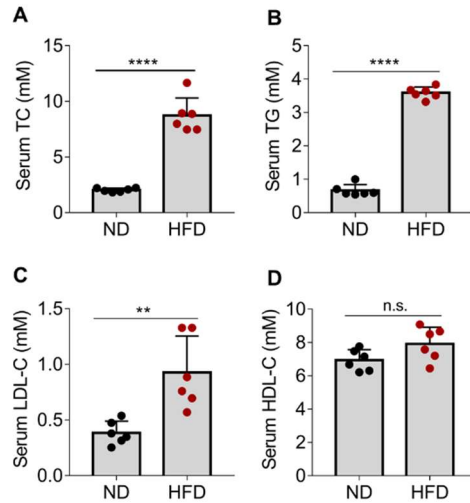

**Fig. S3** Comparison of serum lipid profile between HFD mice and ND mice in 17 weeks old male C57BL/6J mice. A. Plasma TC concentration (in mM, n = 6). B. Plasma TG concentration (in mM, n = 6). C. Plasma LDL-Cholesterol concentration (in mM, n = 6). D. Plasma HDL-Cholesterol concentration (in mM, n = 6). The data were presented as the mean  $\pm$  S.D.,  $**p < 0.01$ ,  $****p < 0.0001$  (Student's *t* test).

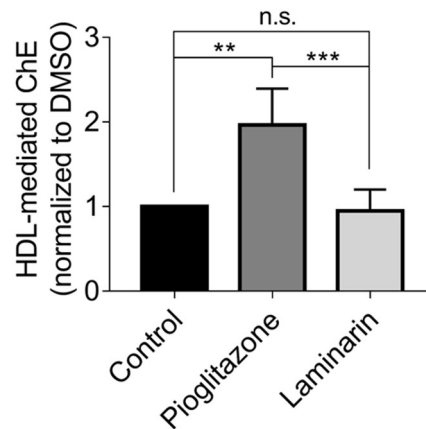

**Fig. S4** The effect of lanimarin on cholesterol efflux from J774A.1 cells. J774A.1 macrophages were first labeled with fluorescent BODIPY-cholesterol (0.0625 mM) and loaded with solvent control (DMSO), laminarin (10  $\mu$ M), and the positive control, pioglitazone (1 $\mu$ M). After 24 h incubation, cells were washed twice with PBS and incubated again with the same compounds in the presence or absence of 1% human plasma dissolved in serum-free medium for 6 h. Extracellular as well as intracellular fluorescence intensity were quantified by flexstation 3. The data were presented as the mean  $\pm$  S.D., \*\* $p$  < 0.01, \*\*\* $p$  < 0.001, *n.s.* no significance (One-way ANOVA).
